# Supplementary material for: Fibrin, Bone Marrow Cells and Macrophages Interactively Modulate Cardiomyoblast Fate
Source: MDPI journal article supplement (doi:10.3390/biomedicines10030527), 2022-02-23
Supplement: s1 [file s1]

<

[illegible]
